# Supplementary material
Source: publisher site journal article supplement (https://www.dovepress.com/article/304126)
Supplement: Supplementary file 1 [file get_supplementary_file.php]

**Supplementary Figure 1: Identification of *ex vivo* c-Kithigh and c-Kitlow ILC2s and their fold change after expansion.**

**
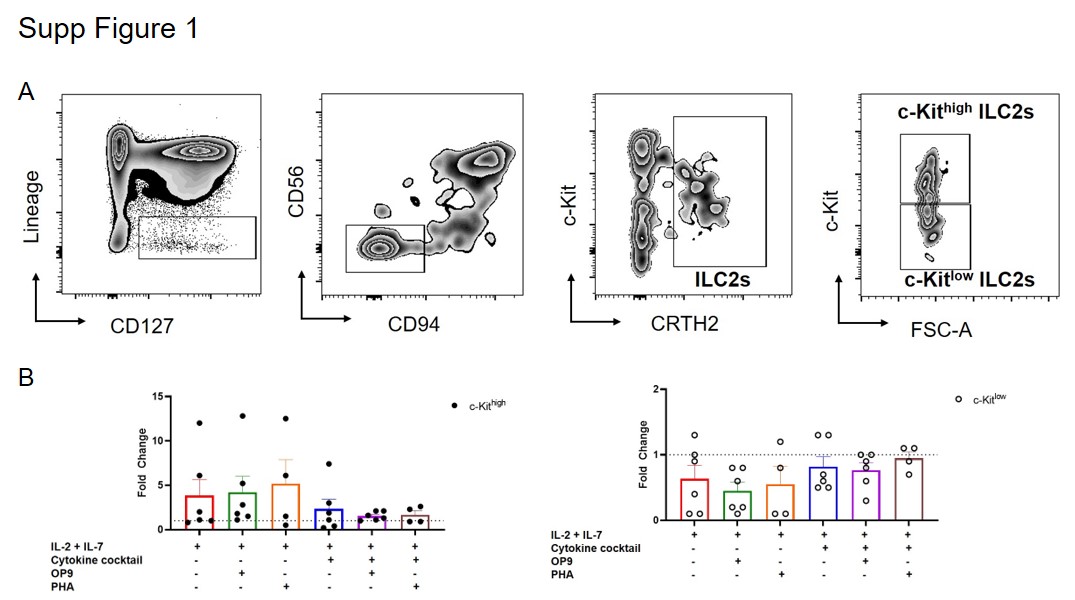
**

**(A)** Gating strategy used to identify ILC2s *ex vivo*.

**(B)** Fold change of c-Kithigh and c-Kitlow ILC2s after the expansion for each condition (n=4/6 HD samples from 4 independent experiments). The dashed line represents the *ex vivo* values.

**Supplementary Figure 2: Some marker expression was not affected by the culture conditions.**

**
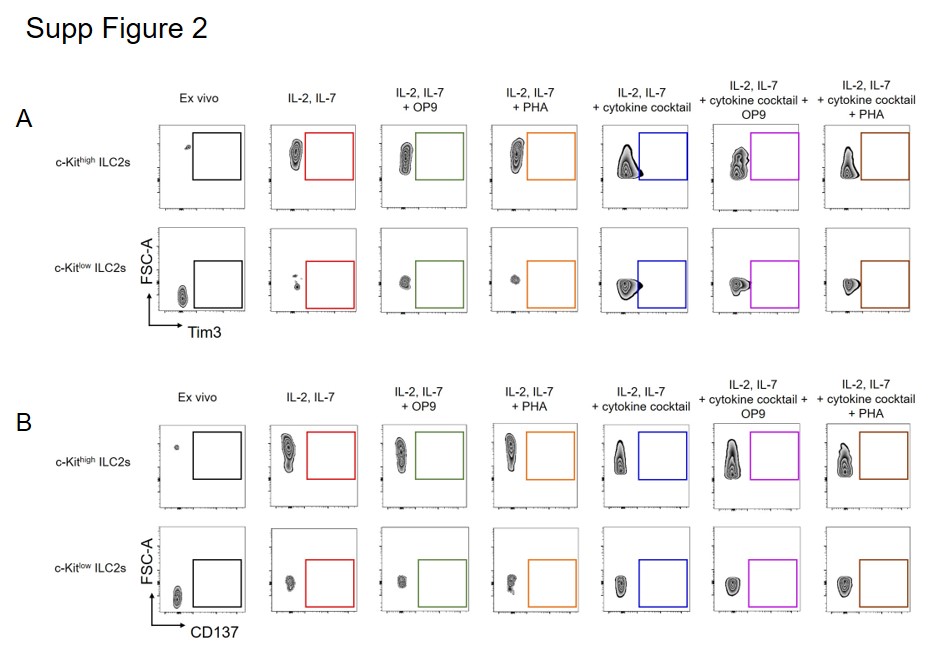
**

Tim3 **(A)** and CD137 **(B)** were not detected in expanded HD ILC2s.


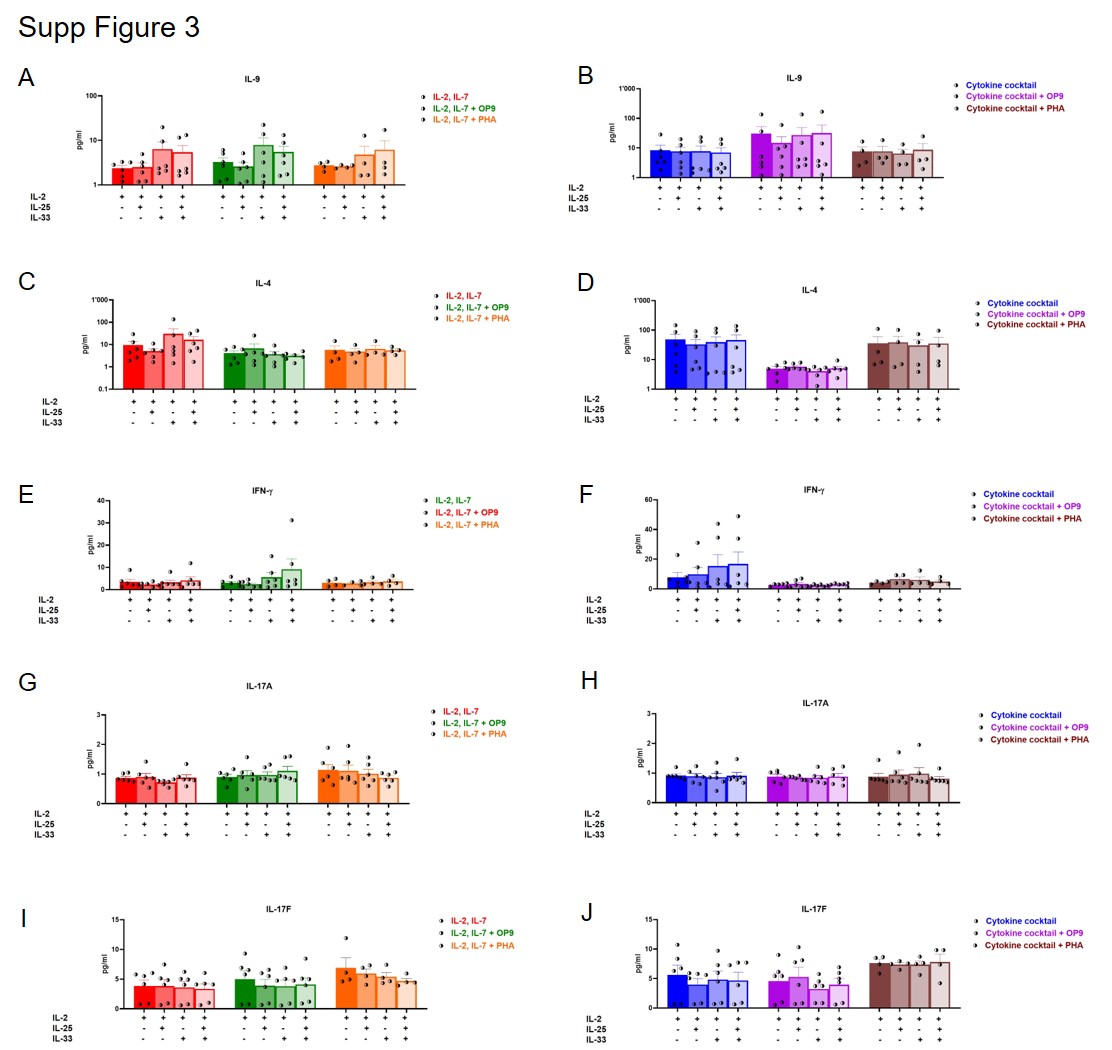
**Supplementary Figure 3:** **Other type 2, type 1 and type 3 cytokines were not secreted by expanded ILC2s.**

IL-9 **(A-B)** and IL-4 **(C-D)** secretions were not significantly modulated upon the stimulations.

ILC2s expanded with the different culture conditions (n=4/6 HD samples from 4 independent experiments) did not modulate IFN-γ **(E-F**), IL-17A **(G-H)** nor IL-17F **(I-J)** secretion**.**

**Supplementary Figure 4: Patient ILC2s expanded with the mitogen displayed the highest proliferation.**

**
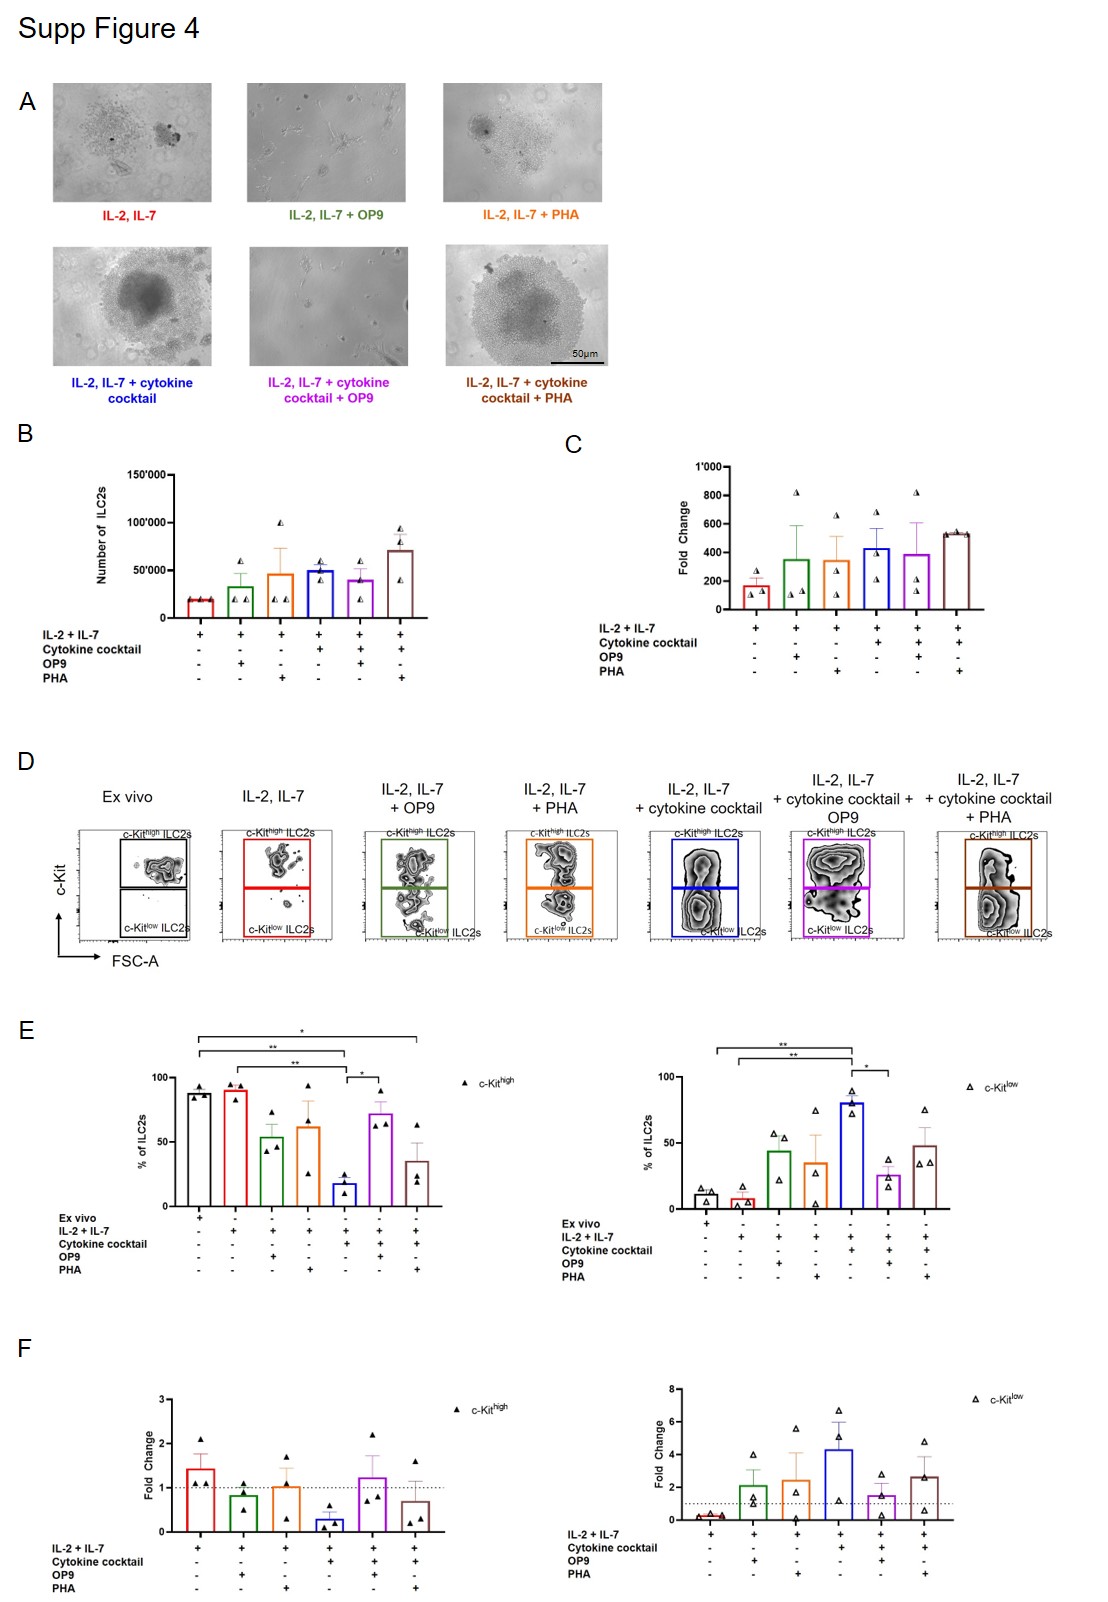
**

**(A)** Representative examples of expanded ILC2s (n=3 allergic patient samples from 2 independent experiments) in the different culture conditions (magnification = 10x).

**(B)** Quantification of the patient ILC2s (n=3 allergic patient samples from 2 independent experiments) counted after 17-19 days of expansion for each culture condition.

**(C)** Fold change of patient ILC2s (n=3 allergic patient samples from 2 independent experiments) after the culture relative to initially plated cells.

**(D)** Representative dotplots of patient c-Kithigh and c-Kitlow ILC2 populations *ex vivo* and after expansion in each culture condition (n=3 allergic patient samples from 2 independent experiments).

**(E)** Quantification of patient c-Kithigh and c-Kitlow ILC2 populations *ex vivo* and after expansion in each culture condition (n=3 allergic patient samples from 2 independent experiments).

**(F)** Fold change of patient c-Kithigh and c-Kitlow ILC2s after the expansion for each condition (n=3 allergic patient samples from 2 independent experiments). The dashed line represents the *ex vivo* value. Data are shown as mean ± standard error of the mean (SEM). Significance was calculated using one-way ANOVA where *P<0.05, **P<0.01

**Supplementary Figure 5: Patients ILC2s expanded with OP9 cells downregulated the expression of a selection of markers.**

**
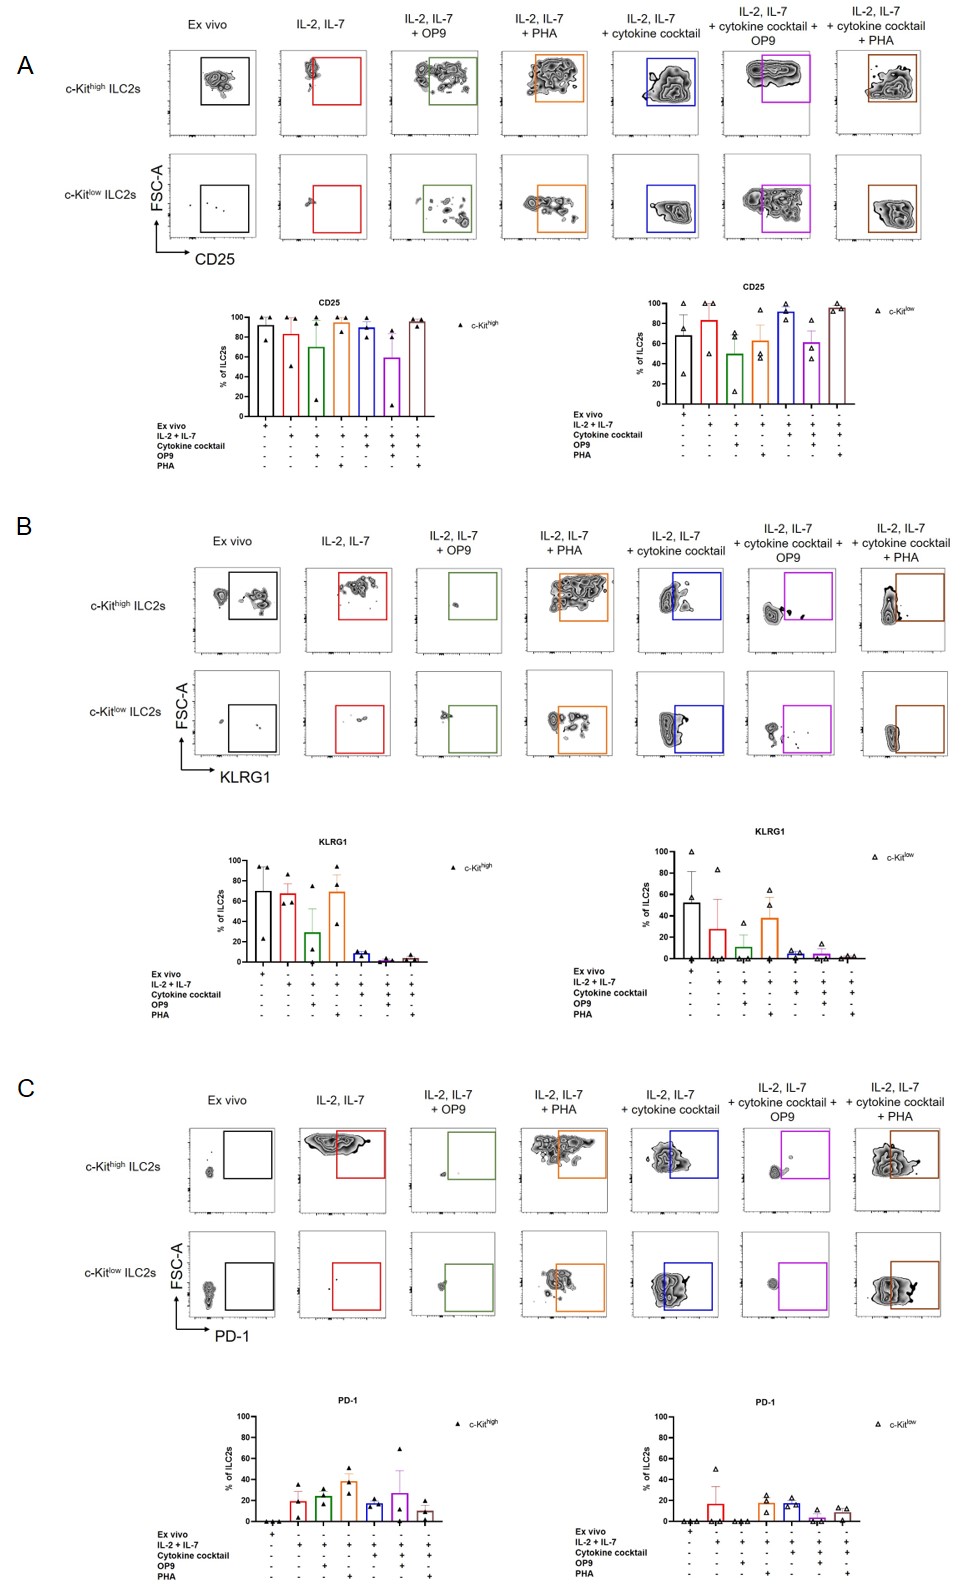
**

**
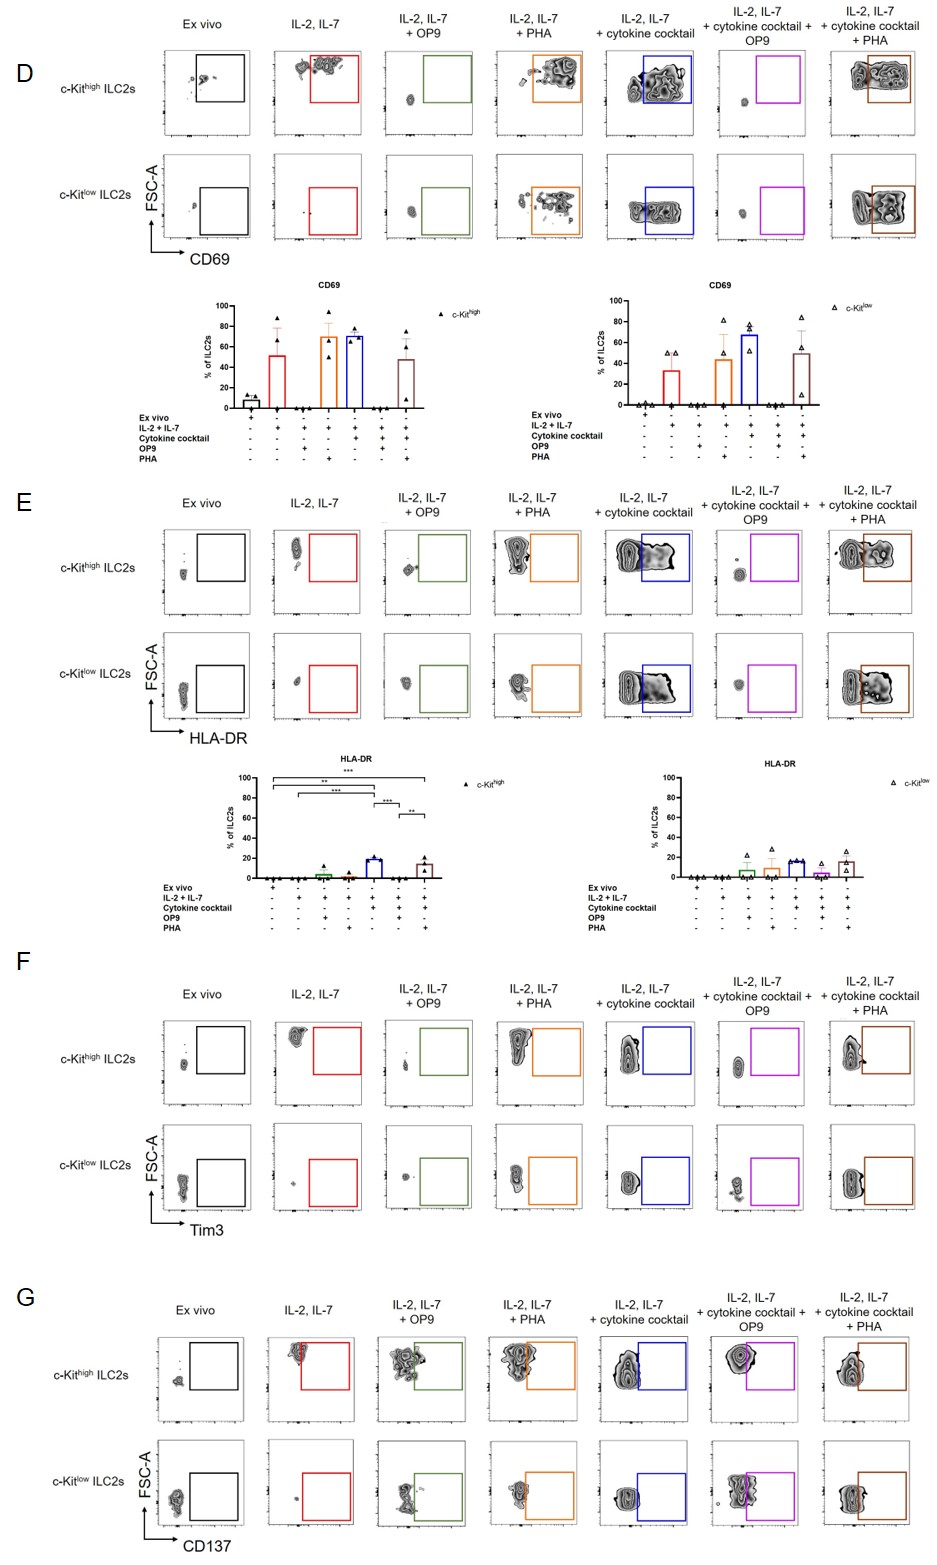
**

Representative dotplots and quantification of CD25 **(A)**,KLRG1 **(B)**, PD-1 **(C)**, CD69 **(D)** and HLA-DR **(E)** in *ex vivo* and *in vitro* expanded patient ILC2s (n=3 allergic patient samples from 2 independent experiments) across different culture conditions.

Tim3 **(F)** and CD137 **(G)** were not detected in expanded patient ILC2s. Data are shown as mean ± standard error of the mean (SEM). Significance was calculated using two-way ANOVA where *P<0.05, **P<0.01, ***P<0001.

**Supplementary Figure 6: The presence of OP9 cells during the expansion tended to impair patient ILC2 function.**

**
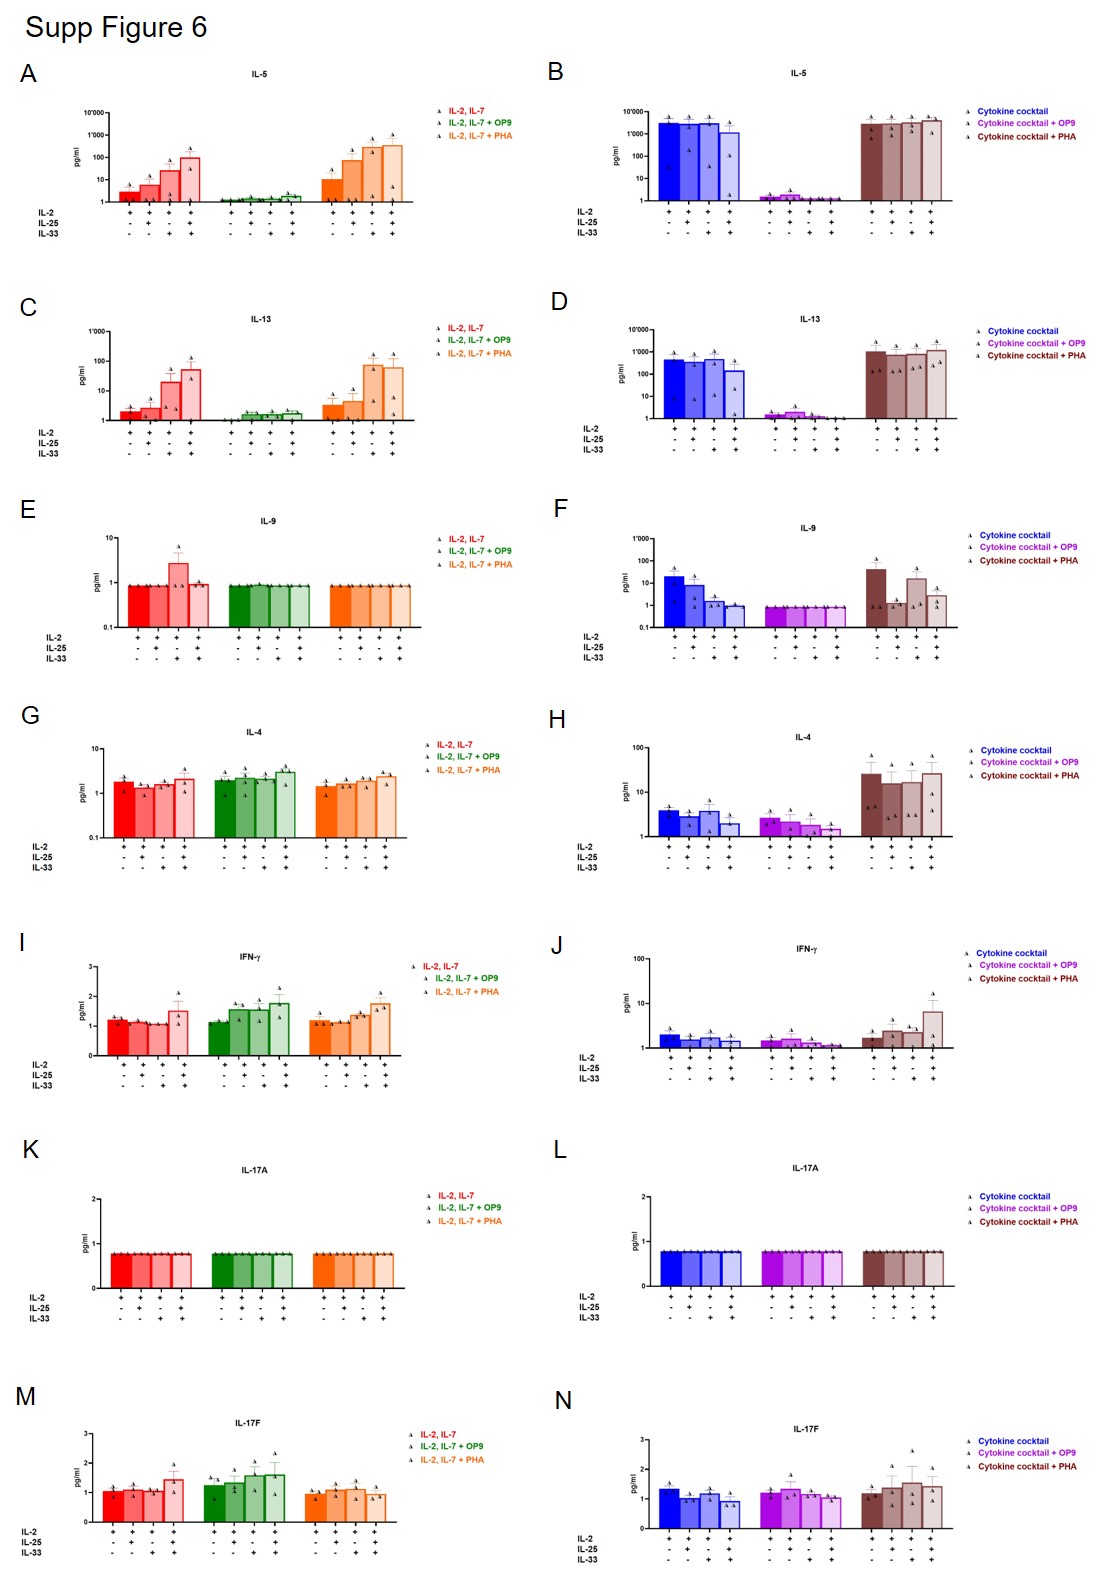
**

IL-5 and IL-13 secretion tended to be impaired by patient ILC2s (n=3 allergic patient samples from 2 independent experiments) expanded with IL-2, IL-7 and OP9 cells **(A-B)** and with the cytokine cocktail and OP9 cells **(C-D)**.

IL-9 **(E-F)** and IL-4 **(G-H)** were not significantly modulated by expanded patient ILC2s (n=3) upon stimulations. IFN-γ **(I-J)**, IL-17A **(K-L)** and IL-17F **(M-N)** were not secreted by expanded patient ILC2s (n=3 allergic patient samples from 2 independent experiments) upon the different stimulations. Data are shown as mean ± standard error of the mean (SEM).

**Supplementary table 1: patient characteristics**

| **Patient** | **Age** | **Gender** | **Rhinitis** | **Polyposis** | **Conjunctivitis** | **Asthma** | **Eosinophiles G/l** | **Allergy** | **Date** | **Acute crisis** | **Treatment** | **Comorbidity** |
| --- | --- | --- | --- | --- | --- | --- | --- | --- | --- | --- | --- | --- |
| NPM | 37 | f | 1 | 0 | 1 | 1 | 0,12 | grass pollen | 05.02.2020 | **no** | No acute treatment. Stable asthma under ICS and LABA (formoterol and budesonide) on demand. Blood sample taken before starting allergen immunotherapy. | No |
| ZL | 63 | m | 1 | 1 | 0 | 1 | 0,19 | grass pollen | 05.02.2020 | **no** | No acute treatment. Stable asthma under ICS and LABA (formoterol and budesonide) on demand. Blood sample taken before starting allergen immunotherapy. | Benign prostatic hyperplasia, hypercholesterolemia |
| AP | 67 | m | 1 | 0 | 1 | 1 | 0,18 | tree (birch, ash), grass, house dust mites, cat and dog dander | 13.02.2020 | **no** | Stable moderate asthma under ICS and LABA (formoterol and budesonide), desloratadine 5 mg 1x/day p.os, intranasal azelastine and fluticasone. Blood sample taken before starting omalizumab. | No |
